# Supplementary material for: Local Duplication of Gonadotropin-Releasing Hormone (GnRH) Receptor before Two Rounds of Whole Genome Duplication and Origin of the Mammalian GnRH Receptor
Source: PubMed Central journal article supplement (PMC3912137; doi:10.1371/journal.pone.0087901), 2014-02-03
Supplement: pone.0087901.s001.pdf [file pone.0087901.s001.pdf]

|    |              | H6                                             | EL3                  | H7                                                                                          | CT                                                                                    |                                                                                       |     |
|----|--------------|------------------------------------------------|----------------------|---------------------------------------------------------------------------------------------|---------------------------------------------------------------------------------------|---------------------------------------------------------------------------------------|-----|
| 1a | Humanm1      | ---LNQSKNNIPRARLKTLMKTVAFATSFVVCWTPYVVLGIWYWF  | DEPML                | --NRLSDPVDNHFHFLFAFLNCFDPLIYGYFSL                                                           | -----                                                                                 | 328                                                                                   |     |
|    | Mousem1      | ---LNQSKNNIPRARLKTLMKTVAFATSFVVCWTPYVVLGIWYWF  | DEPML                | --NRVSEPVNHFFFLFAFLNCFDPLIYGYFSL                                                            | -----                                                                                 | 327                                                                                   |     |
| 1b | Coelacanth   | ---LKRSKNNIPQARLKTLMKTIAFATSFIIICWAPYVVLGIWYWF | PEIIL                | --RWVSDPVYHFFCLFGLLNCFDPLIYGYFSL                                                            | -----                                                                                 | 329                                                                                   |     |
|    | Xenopusn2    | L--ARSKNDLISKARLKTLMKTLVIVVSVFVVCWTPYVVLGIWYWF | QPEMI                | --NQTPEYLNHSLFLFGLLHCTDPLVYGLYTPSFKEDLRSWIRRVSSLLSRRAKNSKQLAGSELNPKDLTSME                   | -----GPMSTAVTMQSVF                                                                    | 375                                                                                   |     |
| 1c | Anolen2      | L--ARGKDDHISKARLKTLMKTLIVVASFVVCWTPYVVLGIWYWF  | QPEMI                | --RQMPPEYVNHFFFLFGLLHCTDPLVYGLYTPSFRDMKMKLGLKLTLLTHQEK                                      | ----LAVIVELKNKEDRE---QGRSSSVSNGGTMHTAF                                                | 373                                                                                   |     |
|    | Chickenn2    | L--VRSQNDHISKARLKTLMKTLIVVASFVVCWTPYVVLGIWYWF  | HPAMI                | --QRMPEYINHSFFFLFGLLHCTDPLIYGLYTPSFRDVLCLRGIEAAISQHVHR                                      | ----KPIVSEKTTKDGVDV--NGQVTSGGSNGTTVNTVC                                               | 377                                                                                   |     |
| 2a | Coelacanth   | L--ARSKDHFSKARLKTLMKTLIVVASFVVCWTPYVVLGIWYWF   | QPEMI                | --QKTPEYVNHFFFLFGLLHCTDPLIYGLYTPSFRDMMCLKRIDRGIHRHKNNSYNQSRDFMLNLKDNLNGEAFDNIKVGLTNGTMVQSIF | -----                                                                                 | 337                                                                                   |     |
|    | Zebrafishn3  | L--RRSGTDMIPKARLKTLMKTLIIIVSFFVVCWTPYVVLGIWYWF | QPEML                | --TVTPEYVHHLFVFGNLNSCCDPVIYGLYTPSFRDLIRF                                                    | ----CCCR--HHKNTPRPQOPRHT                                                              | 377                                                                                   |     |
| 2b | Zebrafishn3b | L--RRSGADMIPKARLKTLMKTLIIIVSFFVVCWTPYVVLGIWYWF | QPEML                | --QVTPEYVHHLFVFGNLNCCDPVIYGLYTPSFRADITS                                                     | ----CFS--RRNQNSPKSLDRLSARRGGASGEAESDPGSGDQPSGQTA                                      | 377                                                                                   |     |
|    | Tetraodon3b  | L--RRSGGDVIPKARLKTLMKTLIIIVSFFVVCWTPYVVLGIWYWF | HPAMI                | --QHTPEYVHHLFVFGNLNCCDPVIYGLYTPSFRADLADVVACCA                                               | ---RAADASPRSDRLSAPAGGAGVDMESDLSSNQSSNA                                                | 367                                                                                   |     |
| 2c | Fugun3b      | L--RRSGRDVIPKARLKTLMKTLIIIVSFFVVCWTPYVVLGIWYWF | HPAMI                | --QHTPEYVHHLFVFGNLNCCDPVIYGLYTPSFRADLADVMACCCG                                              | ---HRAADASPRSDRLSAPVGGAAEMESDLSSNQSSNAG                                               | 367                                                                                   |     |
|    | Medakan3     | L--RRSGTDIIPKARLKTLMKTLIIIVSFFVVCWTPYVVLGIWYWF | QPEML                | --RVTPEYVHHLFVFGNLNCCDPVIYGLYTPSFRADLAA                                                     | ----CCR--WSKESSPMSLNLSTRRGPSSGHEPQ                                                    | 363                                                                                   |     |
| 2a | Tetraodon3   | L--RRSGTDIIPKARLKTLMKTLIIIVSFFVVCWTPYVVLGIWYWF | QPEML                | --RVTPEYVHHLFVFGNLNCCDPVIYGLYTPSFRADLAA                                                     | ----CFR--QKRIKASARLPPQAGDEHTNQ                                                        | 353                                                                                   |     |
|    | Fugun3       | L--RRSGTDIIPKARLKTLMKTLIIIVSFFVVCWTPYVVLGIWYWF | QPEML                | --RVTPEYVHHLFVFGNLNCCDPVIYGLYTPSFRADLAA                                                     | ----CFH--QKRRA--ARAPPNRARS                                                            | 354                                                                                   |     |
| 2b | Coelacanth2a | A---LRCTRNYIPVVRMKTLMKTLVLI                    | STFIVC               | WTPYVVLGIWYWFPEMINNQTVPESINHLFVFGLNSSLDPLVSRAGYLKIKRRAVSNT                                  | -----                                                                                 | 411                                                                                   |     |
|    | Zebrafishn1  | ---LRRSHSNIPKARLKTLMKTLIIIVSFFVVCWTPYVVLGIWYWF | PEDEL                | --EETVSHSLTHLFI                                                                             | FGLFNALDPLIYGLFTIHFRLKGLKRYCRSAVLT-ESEN-NSIITGSLKCSFSPFRMCRVTSQGTGDPKONTSTVGEEDKAA    | 400                                                                                   |     |
| 2c | Medakan1     | ---LRRSHNNIPKARLKTLMKTLIIIVSFFVVCWTPYVVLGIWYWF | FPEKM                | --EETVSHSLTHLFI                                                                             | FGLFNALDPLIYGLFTIHLRQARRRQISNAQT-ELEN-NSCLMQMSCLSAHRQNVSSGLSKHT-EEINDNSSTKNASSPIS     | 390                                                                                   |     |
|    | Tetraodon1   | ---LRRSHNNIPKARLKTLMKTLIIIVSFFVVCWTPYVVLGIWYWF | FPEKM                | --EETVSHSLTHLFI                                                                             | FGLFNALDPLIYGLFTVRLHQLKRCRRTANTOT-DLEN-NTCLVHMTRFSSORHYASGAHETHK-EMIDD-TCTNCSRPIIP    | 389                                                                                   |     |
| 2a | Fugun1       | ---LRRSHNNIPKARLKTLMKTLIIIVSFFVVCWTPYVVLGIWYWF | FPEKM                | --EETVSHSLTHLFI                                                                             | FGLFNALDPLIYGLFTIHLHQLKRCRRTANTOT-DLEN-NTCFVHMTRLSHLLHNASGGYHTDK-EEVND---             | 386                                                                                   |     |
|    | Medakan1b    | ---LRCCKNNIPKARLKTLMKTLIIIVSFFVVCWTPYVVLGIWYWF | FPEKM                | --EETVSHSLTHLFI                                                                             | FGLFNALDPLIYGLFTIRFRGRRKCYGGATATL-SLES-KVVTAEAVKRSDDASASRGD-AGEKDNNSARTERQSSGGNI---   | 398                                                                                   |     |
| 2b | Fugun1b      | ---LRCCKNNIPKARLKTLMKTLIIIVSFFVVCWTPYVVLGIWYWF | FPEKM                | --EETVSHSLTHLFI                                                                             | FGLFNALDPLIYGLFTIRFRGRRKCYGGATATL-SLES-KVVTAEAVKRSDDASASRGD-AGEKDNNSARTERQSSGGNI---   | 400                                                                                   |     |
|    | Tetraodon1b  | ---LRRSRDNIPKARLKTLMKTLIIIVSFFVVCWTPYVVLGIWYWF | FPEHL                | --EGKVSLSLTHLFI                                                                             | FGLFNALDPLIYGLFTIRFRGRRKCYGGATATL-SLES-KVVTAEAVKRSDDASASRGD-AGEKDNNSARTERQSSGGNI---   | 341                                                                                   |     |
| 2c | Medakan2     | ---LRCCKNNIPKARLKTLMKTLIIIVSFFVVCWTPYVVLGIWYWF | FPEKM                | --EETVSHSLTHLFI                                                                             | FGLFNALDPLIYGLFTIHFRLKGLRFFYGNAAEAT-DADI-NTVVVTGSFTCAASSLSLKRKLWHPQERLVLHRDNH-SKADLPS | 390                                                                                   |     |
|    | Fugun2       | ---LRRSKNNIPKARLKTLMKTLIIIVSFFVVCWTPYVVLGIWYWF | FPEKM                | --EETVSHSLTHLFI                                                                             | FGLFNALDPLIYGLFTIHFRLKGLRFFYGNAAEAT-DADI-NTVVVTGSFTCAASSLSLKRKLWHPQERLVLHRDNH-SKADLPS | 413                                                                                   |     |
| 2a | Tetraodon2   | ---LRRSRNNIPKARLKTLMKTLIIIVSFFVVCWTPYVVLGIWYWF | FPEHL                | --EGKVSLSLTHLFI                                                                             | FGLFNALDPLIYGLFTIHFRLKGLRFFYGNAAEAT-DADI-NTVVVTGSFTCAASSLSLKRKLWHPQERLVLHRDNH-SKADLPS | 413                                                                                   |     |
|    | Zebrafishn2  | ---LRRSKNNIPKARLKTLMKTLIIIVSFFVVCWTPYVVLGIWYWF | FPEHL                | --EGKVSLSLTHLFI                                                                             | FGLFNALDPLIYGLFTIHFRLKGLRFFYGNAAEAT-DADI-NTVVVTGSFTCAASSLSLKRKLWHPQERLVLHRDNH-SKADLPS | 405                                                                                   |     |
| 2b | Xenopusn1    | ---LRRSKNNIPKARLKTLMKTLIIIVSFFVVCWTPYVVLGIWYWF | FPEHL                | --EGKVSLSLTHLFI                                                                             | FGLFNALDPLIYGLFTIHFRLKGLRFFYGNAAEAT-DADI-NTVVVTGSFTCAASSLSLKRKLWHPQERLVLHRDNH-SKADLPS | 398                                                                                   |     |
|    | Chickenn1    | ---LRRSGSNIPRARLKTLMKTLIIIVSFFVVCWTPYVVLGIWYWF | CPRAM                | --QQKVPVPSLSHILFI                                                                           | FGLFNALDPLIYGLFTIHFRLKGLRFFYGNAAEAT-DADI-NTVVVTGSFTCAASSLSLKRKLWHPQERLVLHRDNH-SKADLPS | 386                                                                                   |     |
| 2c | Coelacanth2b | ---LRRSKDHIPKARLKTLMKTLIIIVSFFVVCWTPYVVLGIWYWF | SPDIA                | --EMVSHSTHMLFI                                                                              | FGLFNALDPLIYGLFTIHFRLKGLRFFYGNAAEAT-DADI-NTVVVTGSFTCAASSLSLKRKLWHPQERLVLHRDNH-SKADLPS | 416                                                                                   |     |
|    | Humanm2/n3   | FA-LRRSFDNRPRVRLRALRLALLVLLT                   | FILCWTPYVVLGIWYWF    | SPSMLSE                                                                                     | --VPPSLSHILFI                                                                         | FGLFNALDPLIYGLFTIHFRLKGLRFFYGNAAEAT-DADI-NTVVVTGSFTCAASSLSLKRKLWHPQERLVLHRDNH-SKADLPS | 405 |
| 2a | Xenopusn3    | ---LRRSSNNIPKARLKTLMKTLIIIVSFFVVCWTPYVVLGIWYWF | SPSMLSE              | --VPPSLSHILFI                                                                               | FGLFNALDPLIYGLFTIHFRLKGLRFFYGNAAEAT-DADI-NTVVVTGSFTCAASSLSLKRKLWHPQERLVLHRDNH-SKADLPS | 400                                                                                   |     |
|    | Coelacanth2c | ---LRRSYNNIPKARLKTLMKTLIIIVSFFVVCWTPYVVLGIWYWF | SPSMLSE              | --VPPSLSHILFI                                                                               | FGLFNALDPLIYGLFTIHFRLKGLRFFYGNAAEAT-DADI-NTVVVTGSFTCAASSLSLKRKLWHPQERLVLHRDNH-SKADLPS | 394                                                                                   |     |
| 2b | Lamprey1     | ---LRRSNNIPKARLKTLMKTLIIIVSFFVVCWTPYVVLGIWYWF  | DRSIVSRKVVPHFVEEMSLT | FGLLNALDPLIYGLYFAAHV                                                                        | REVRRCCRWPRTAADRDSSTPVTGFRYSASSVRSRRVFPACGEQPEATGAHPTPATRLLQR                         | 407                                                                                   |     |
|    | Lamprey2     | ---CNHGPTLSRARARTLCMTALIVSFFVVCWTPYVVLGIWYWF   | CIPAMASEDHI          | PEAVSHGLFL                                                                                  | FGLLNALDPLIYGLYFAAHV                                                                  | REVRRCCRWPRTAADRDSSTPVTGFRYSASSVRSRRVFPACGEQPEATGAHPTPATRLLQR                         | 411 |
| 2c | Lamprey3     | GVTLRCSNNIPRARLKTLMKTLIIIVSFFVVCWTPYVVLGIWYWF  | WPSALDQGTLP          | PEYINHIVFL                                                                                  | FGLLNALDPLIYGLYFAAHV                                                                  | REVRRCCRWPRTAADRDSSTPVTGFRYSASSVRSRRVFPACGEQPEATGAHPTPATRLLQR                         | 411 |
|    |              |                                                |                      |                                                                                             |                                                                                       | FSGQWD-GTLCYRYCC-----CYCCWSSSSST-----RRRRSGTTTATTSSRGTMAS                             | 422 |

|    |              |                                                        |  |     |  |  |
|----|--------------|--------------------------------------------------------|--|-----|--|--|
| 1a | Humanm1      | -----                                                  |  |     |  |  |
|    | Mousem1      | -----                                                  |  |     |  |  |
| 1b | Coelacanth1a | -----                                                  |  |     |  |  |
|    | Xenopusn2    | -----                                                  |  |     |  |  |
| 1c | Anolen2      | -----                                                  |  |     |  |  |
|    | Chickenn2    | -----                                                  |  |     |  |  |
| 2a | Coelacanth   | -----                                                  |  |     |  |  |
|    | Zebrafishn3  | -----                                                  |  |     |  |  |
| 2b | Zebrafishn3b | -----                                                  |  |     |  |  |
|    | Tetraodon3b  | -----                                                  |  |     |  |  |
| 2c | Fugun3b      | -----                                                  |  |     |  |  |
|    | Medekan3     | -----                                                  |  |     |  |  |
| 2a | Teteaodon3   | -----                                                  |  |     |  |  |
|    | Fugun3       | -----                                                  |  |     |  |  |
| 2b | Coelacanth2a | -----                                                  |  |     |  |  |
|    | Zebrafishn1  | DGKTKE                                                 |  | 406 |  |  |
| 2c | Medakan1     | VSRI                                                   |  | 394 |  |  |
|    | Tetraodon1   | VSKM                                                   |  | 393 |  |  |
| 2a | Fugun1       | VSKM                                                   |  | 390 |  |  |
|    | Medekan1b    | -----                                                  |  |     |  |  |
| 2b | Fugun1b      | -----                                                  |  |     |  |  |
|    | Tetraodon1b  | -----                                                  |  |     |  |  |
| 2c | Medakan2     | PKGNNLLAESKAVRSLNOSRESIL                               |  | 415 |  |  |
|    | Fugun2       | PFORFEISPTIKTNNNSNI                                    |  | 413 |  |  |
| 2a | Tetraodon2   | NLOGCSTOKLHLCST                                        |  | 420 |  |  |
|    | Zebrafishn2  | TKNALYSSGVATVE                                         |  | 412 |  |  |
| 2b | Xenopusn1    | GLNSSCL                                                |  | 395 |  |  |
|    | Chickenn1    | SAL                                                    |  | 419 |  |  |
| 2c | Coelacanth2b | -----                                                  |  |     |  |  |
|    | Humanm2/n3   | -----                                                  |  |     |  |  |
| 2a | Xenopusn3    | SGKCEQCRGKIMESFM                                       |  | 410 |  |  |
|    | Coelacanth2c | EINCDLCKRNAENEM                                        |  | 427 |  |  |
| 2b | Lamprey1     | GCLVAGVPVNRAAGMAAGAKAFCDASGGGAGGGGGGEGCTEKLVCPESCI     |  | 460 |  |  |
|    | Lamprey2     | RSYLSSSVSAFVDFVRGHWSRRPHGDARAAAARVPSPTTVYVLSQLCDPHATQG |  | 466 |  |  |
| 2c | Lamprey3     | ELEPQPTLATASVDLSAPLQRQGCPPVQ                           |  | 450 |  |  |
