# Supplementary material for: Local Duplication of Gonadotropin-Releasing Hormone (GnRH) Receptor before Two Rounds of Whole Genome Duplication and Origin of the Mammalian GnRH Receptor
Source: PubMed Central journal article supplement (PMC3912137; doi:10.1371/journal.pone.0087901), 2014-02-03
Supplement: pone.0087901.s002.pdf [file pone.0087901.s002.pdf]

**Table S1.** The accession numbers for NCBI and ENSEMBL of *C. elegans*, *Drosophila*, *Ciona*, and amphioxus GnRHRs are given beneath receptor's name as well as gene location in brackets.

| <b>Invertebrate Species</b> |                                       |                                        |                                                     |                                             |
|-----------------------------|---------------------------------------|----------------------------------------|-----------------------------------------------------|---------------------------------------------|
|                             | <b>C.elegans</b>                      | <b>Drosophila</b>                      | <b><i>Ciona intestinalis</i></b>                    | <b><i>Amphioxus</i></b>                     |
| <b>Receptors</b>            | <b>GnRHR</b><br>NP_001249720<br>(Ch1) | <b>GnRHR1</b><br>FBgn0025595<br>(Ch2L) | <b>GnRHR1</b><br>NP_001027765<br>(Ch3)              | <b>GnRHR1</b><br>EU433377<br>(Scaffold 15)  |
|                             |                                       | <b>GnRHR2</b><br>FBgn0036278<br>(Ch3L) | <b>GnRHR2</b><br>NP_001027656<br>(Ch3)              | <b>GnRHR2</b><br>EU433378<br>(Scaffold 15)  |
|                             |                                       |                                        | <b>GnRHR3</b><br>NP_001165352<br>(Ch3)              | <b>GnRHR3</b><br>EU433379<br>(Scaffold 629) |
|                             |                                       |                                        | <b>GnRHR4</b><br>NP_001165351<br>(ScaffoldHT000157) | <b>GnRHR4</b><br>FJ426561<br>(Scaffold 15)  |
